# Supplementary material
Source: PubMed Central journal article supplement (PMC4573726)
Supplement: JB.00291-15_zjb999093779so1.pdf [file JB.00291-15_zjb999093779so1.pdf]

## 1 **The possible influence of growth stages and viable counts on transformation frequency**

2 In our experiments, the samples used in the transformation tests might have exhibited different  
3 growth rates and viable counts. To avoid influencing transformation frequency as a result of different  
4 growth rates in the samples, cultures were always grown to stationary phase in shaking culture stage  
5 before being transferred to a beaker for static cultivation. Shaking cultivation usually lasted for 14 h  
6 to ensure that all samples reached stationary phase. All growth curves of BW25113,  $\Delta rpoS$ , and  
7 BW25113 with glucose added reached stationary phase after incubation for 14 h (Fig. S1); however,  
8  $\Delta crp$  and  $\Delta cyaA$  exhibited a 12-h delay in reaching stationary phase (Fig. S2A). To avoid the effect  
9 of different growth phases on transformation, the shaking cultivation of  $\Delta crp$  and  $\Delta cyaA$  was  
10 prolonged to 26 h before transformation experiments were performed. Similar to our previous results,  
11 the transformation frequencies of  $\Delta crp$  and  $\Delta cyaA$  were nearly an order of magnitude higher than for  
12 the wild type (Fig. S2B). The relationship between cell density and transformants has been examined  
13 in previous studies. A linear relationship was observed between transformation frequency and cell  
14 density which ranges between  $2 \times 10^7$  and  $1.28 \times 10^8$  CFU/plate with strain ZK126 (1). In this work,  
15 we investigated the effect of cell density on transformation with strain BW25113. A transformation  
16 experiment in which the total CFUs ranged from  $\sim 10^8$  to  $\sim 10^{10}$  CFU/ml was performed. A linear  
17 relationship was observed between cell density and the number of transformants (Fig. S3). Thus, the  
18 transformation frequency precisely reflects the transformability of samples with viable counts in the  
19 range of  $\sim 10^8$  to  $\sim 10^{10}$  CFU/ml. Another experiment also confirmed this. The viable count of the  
20 wild-type strain supplemented with glucose exhibited no significant difference compared to the  
21 control. The viable counts of  $\Delta rpoS$ ,  $\Delta crp$ , and  $\Delta cyaA$  were 95%, 76%, and 74% lower than that of  
22 the wild-type, respectively. We concentrated the  $\Delta rpoS$ ,  $\Delta crp$  and  $\Delta cyaA$  cultures by the appropriate

23 multiples to obtain similar viable counts to the wild-type. As expected, the numbers of transformants  
24 increased accordingly and the transformation frequencies remained unchanged (Fig. S4AB).

25

26

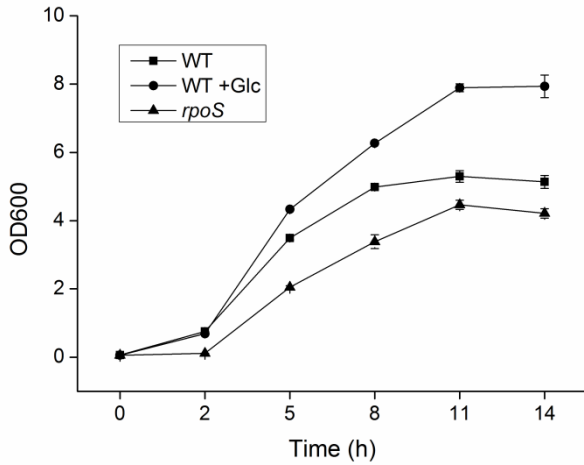

27

28 **FIG. S1.** Growth curves of BW25113, BW25113 with additional glucose and  $\Delta rpoS$ .

29

30

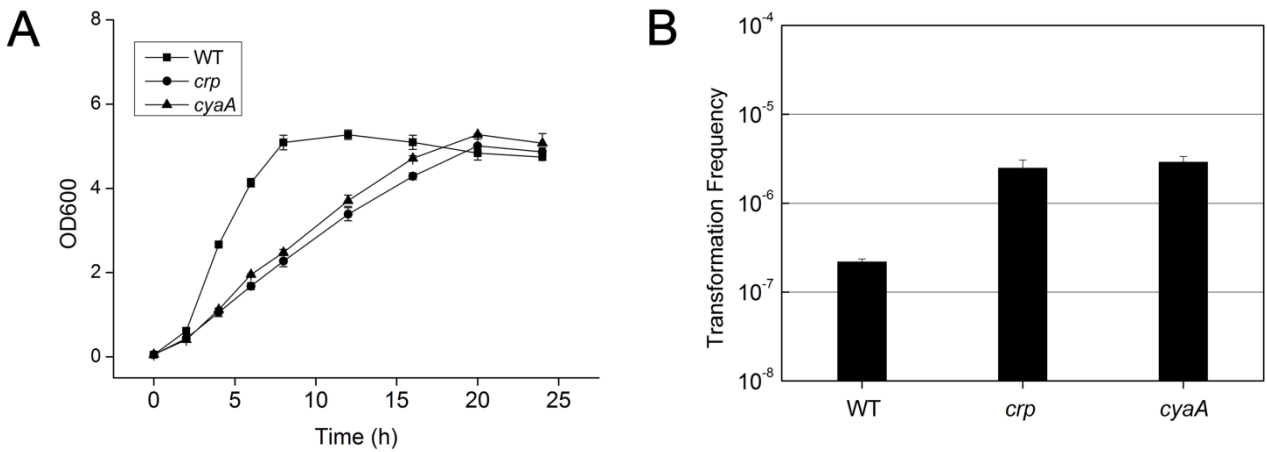

31

32 **FIG. S2.** (A) Growth curves of BW25113,  $\Delta crp$  and  $\Delta cyaA$ . (B) The transformation frequencies of  
33  $\Delta crp$  and  $\Delta cyaA$  with a prolonged shaking cultivation.

34

35

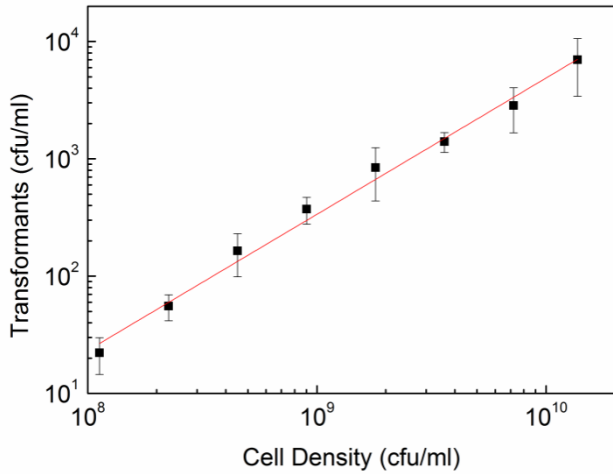

36

37 **FIG. S3. The relationship between cell density and transformants.** Twofold serial concentrations

38 and dilutions from the BW25113 culture were subject to transformation experiment.

39

40

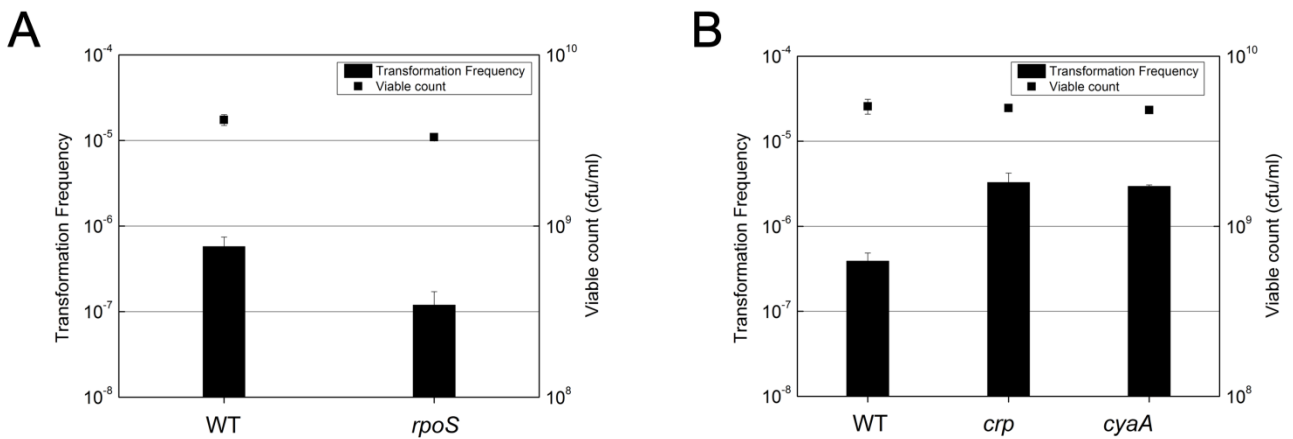

41

42 **FIG. S4. (A)** The transformation frequency and viable count of  $\Delta rpoS$  after concentrating the culture

43 by 20-fold. **(B)** The transformation frequencies and viable counts of  $\Delta crp$  and  $\Delta cyaA$  after

44 concentrating the cultures by 4-fold.

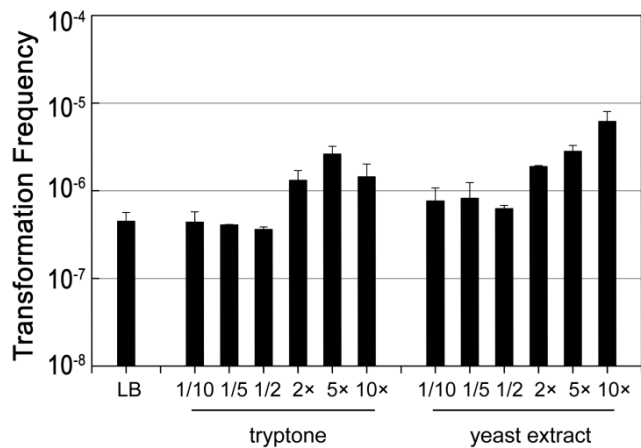

45

46 **FIG. S5. Transformation frequencies of *E. coli* incubated in modified LB medium.** Strains were  
 47 inoculated in modified LB medium with various concentrations of tryptone or yeast extract. The  
 48 transformation procedure was performed with standard protocol. Sample grown in normal LB broth  
 49 served as controls.

50
